# Supplementary material for: Vitamin D Suppresses Ovarian Cancer Growth and Invasion by Targeting Long Non-Coding RNA CCAT2
Source: MDPI journal article supplement (doi:10.3390/ijms21072334), 2020-03-27
Supplement: s1 [file s1]

## Supplementary Materials

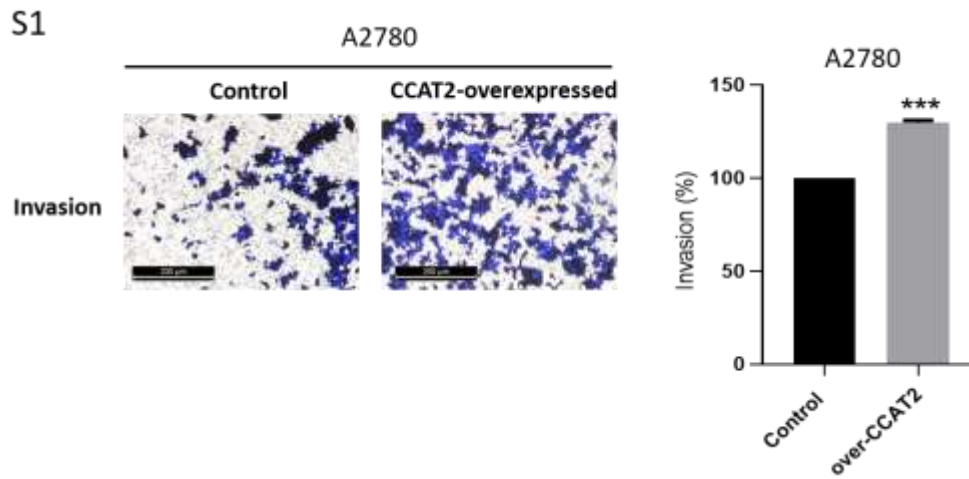

**Figure S1.** CCAT2 promotes cell invasion in A2780 cells. A2780 cells were transfected with PCS6-CCAT2 plasmid and performed to the invasion assay for 48 hours. The invasive capability of CCAT2-overexpressed A2780 cells was obviously induced compared to the control group. (\*\*\*)  $p < 0.001$
